# Supplementary material for: Hydromulching Enhances the Growth of Artichoke (Cynara cardunculus var. scolymus) Plants Subjected to Drought Stress through Hormonal Regulation of Source–Sink Relationships
Source: MDPI journal article supplement (doi:10.3390/agronomy12071713), 2022-07-20
Supplement: s1 [file s1]

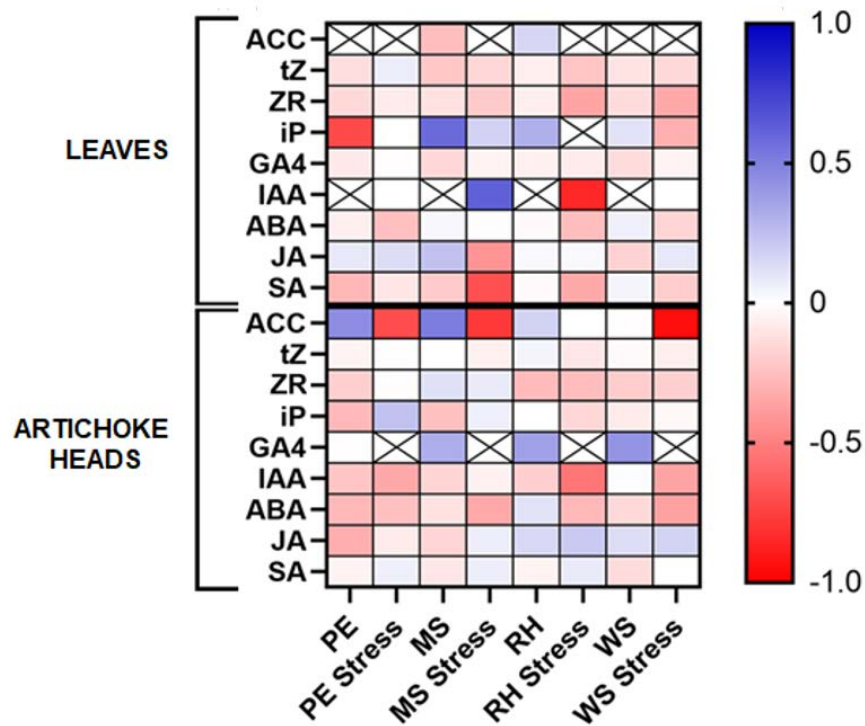

**Figure S1.** Cluster heat plot showing hormonal changes with respect to the bare soil treatment in leaves and heads of artichoke plants of the commercial variety Symphony non-mulched or subjected to different mulching treatments and cultivated under control (well-watered) and water stress (70% ETc) conditions. Abbreviations used: gibberellin A4 (GA4), *trans*-zeatin (tZ), zeatin riboside (ZR), isopentenyladenine (iP), abscisic acid (ABA), 1-aminocyclopropane-1-carboxylic acid (ACC), indoleacetic acid (IAA), jasmonic acid (JA), salicylic acid (SA), polyethylene mulch (PE), mushroom substrate-based hydromulch (MS), rice hulls-based hydromulch (RH), and wheat straw-based hydromulch (WS).
